# Supplementary material for: The identification of CRNDE, H19, UCA1 and HOTAIR as the key lncRNAs involved in oxaliplatin or irinotecan resistance in the chemotherapy of colorectal cancer based on integrative bioinformatics analysis
Source: PubMed Central journal article supplement — Mol Med Rep. 2019 Aug 14;20(4):3583–96. doi: 10.3892/mmr.2019.10588 (PMC6755158; doi:10.3892/mmr.2019.10588), 2019-08-14

Figure S1. Workflow for the bioinformatics analysis strategy. KEGG, Kyoto Encyclopedia of Genes and Genomes; PPI, protein-protein interaction; Inc, long noncoding; GO, gene ontology; TCGA, the Cancer Genome Atlas.

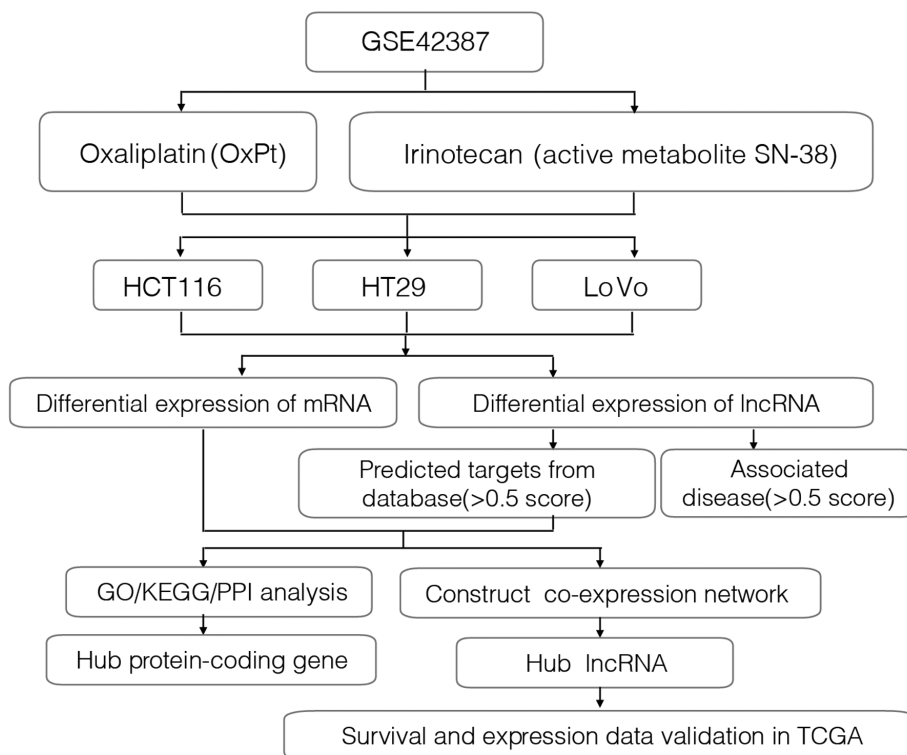

Figure S2. Distribution analysis of gene expression. (A) Distribution of gene expression levels in each group, where the x-axis indicates the relative intensity value and the y-axis shows the proportion of genes. (B) Distribution of genes based on the expression level of each sample, where x-axis shows each analyzed sample and y-axis shows the gene value distribution in each sample. (C) Principle component analysis of each sample in the nine groups: Component 1 vs. component 2. Dots represent the PC value of each sample. (D) Number of screened DEGs in six groups. (E) Volcano graph displaying pairs of expressed genes, where the x- and y-axis represent the log-transformed threshold values. Dots represent DEGs; red dots indicate significantly upregulated DEGs and blue dots indicate significantly downregulated DEGs that passed the screening threshold. Black dots represent non-significant DEGs. DEGs, differentially expressed genes.

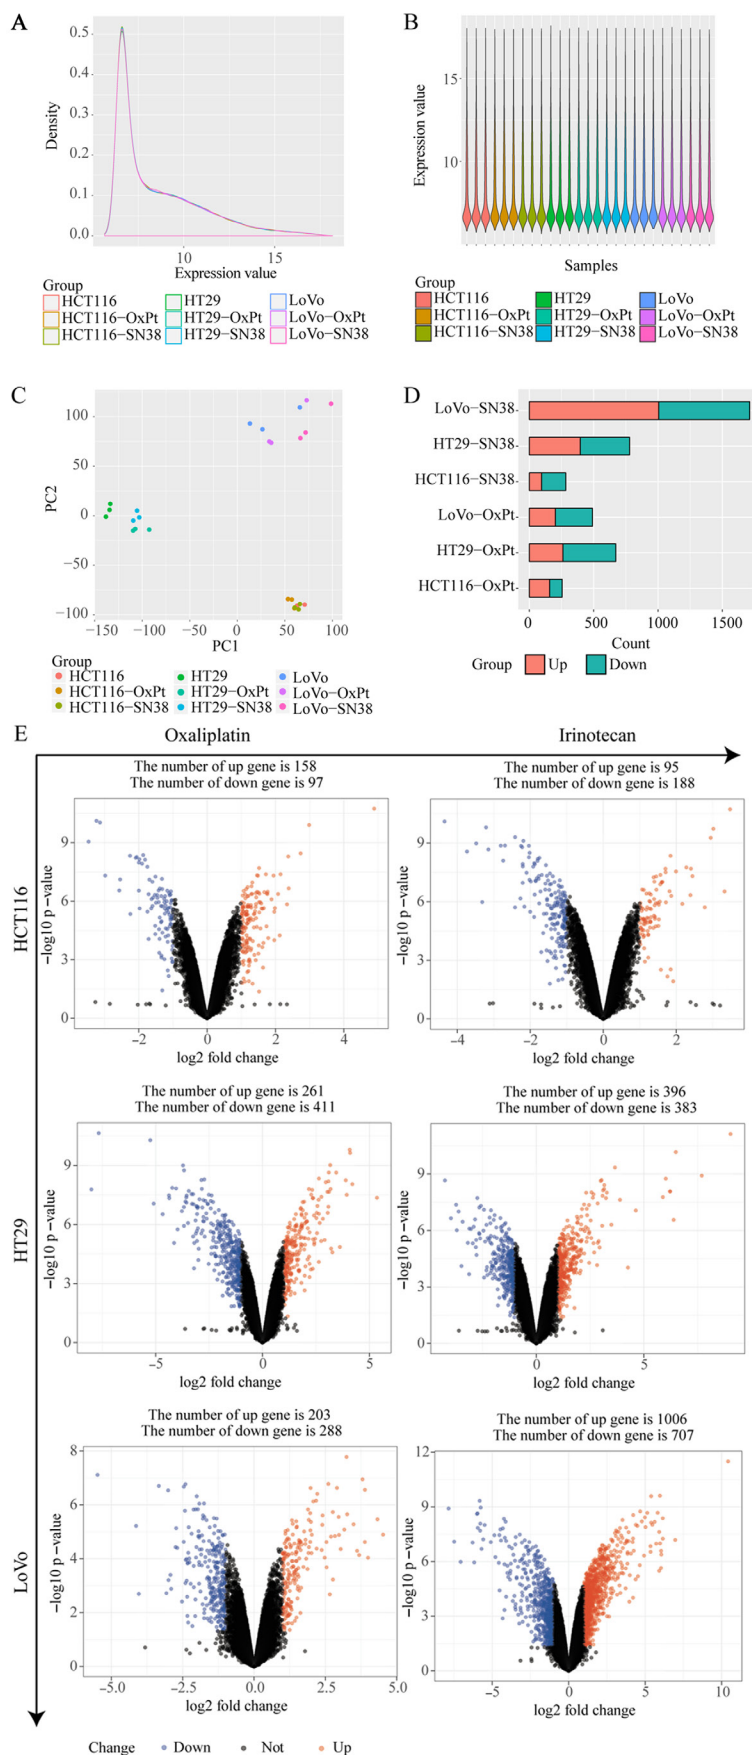

Figure S3. Cancer Hallmarks Analytics Tool text mining analysis. The value on the x-axis indicates npmi. Different-colored bars indicate specific cancer hallmarks. Npmi, normalized point-wise mutual information.

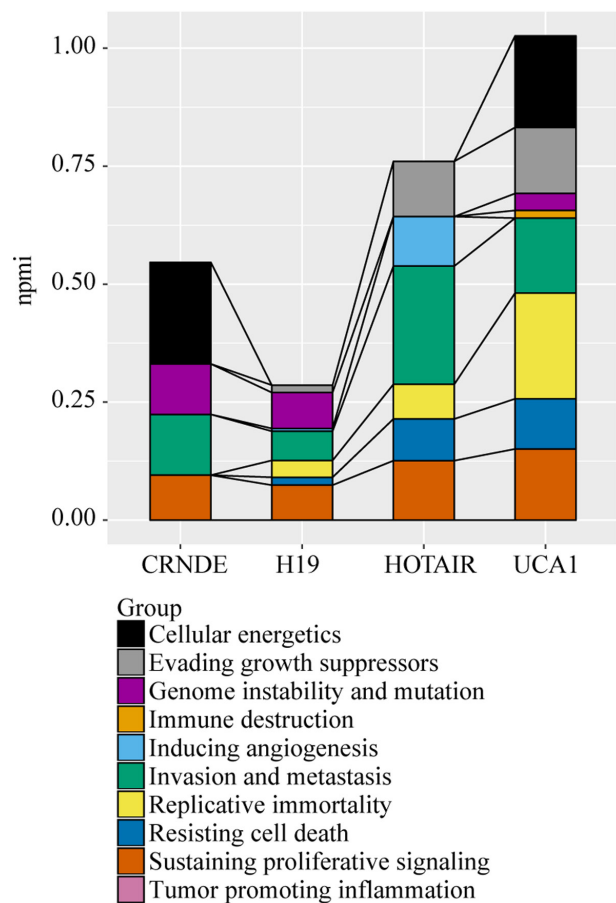

Supplement: Supplementary_Data.pdf [file Supplementary_Data.pdf]
